# Supplementary material for: Interplay between DsbA1, DsbA2 and C8J_1298 Periplasmic Oxidoreductases of Campylobacter jejuni and Their Impact on Bacterial Physiology and Pathogenesis
Source: MDPI journal article supplement (doi:10.3390/ijms222413451), 2021-12-15
Supplement: s1 [file s1]

Table S1. Proteins identified by MS analysis. Periplasmic proteome of *C. jejuni* 81116 wt strain and double mutated strain  $\Delta cjd sbA1\Delta c8j_{1298}$  was compared. Table presents only those proteins which ratio in  $\Delta cjd sbA1\Delta c8j_{1298}$  strain to wt strain was 0.55 or less.

(\*Uniprot ID/locustag in most cases is determined for *C. jejuni* NCTC 11168, when protein was identified only for *C. jejuni* 81-176 strain we listed identifiers coming from that strain; NI\*\* – homolog protein not identified in *C. jejuni* 81116 strain

| Uniprot ID* | Locustag<br><i>C. jejuni</i> 11168 or<br><i>C. jejuni</i> 81-176 * | locustag<br><i>C. jejuni</i><br>81116 | NCBI protein ID<br>(for <i>C. jejuni</i><br>81116) | q-value | Ratio<br>$\Delta cjd sbA1\Delta c8j_{1298}$<br>/WT | peptide<br>number | description                                                                 | SignalP<br>prediction |
|-------------|--------------------------------------------------------------------|---------------------------------------|----------------------------------------------------|---------|----------------------------------------------------|-------------------|-----------------------------------------------------------------------------|-----------------------|
| Q0PC48      | Cj0089                                                             | C8J_0082                              | WP_002866718.1                                     | NA      | only in WT                                         | 4                 | Putative lipoprotein                                                        | Sec/SPII              |
| Q0P863      | Cj1565c                                                            | C8J_1462                              | WP_002866855.1                                     | NA      | only in WT                                         | 2                 | Paralysed flagellum protein                                                 | Sec/SPI               |
| Q9PHT5      | Cj0581                                                             | C8J_0543                              | WP_002854797.1                                     | NA      | only in A1                                         | 2                 | RNA pyrophosphohydrolase                                                    |                       |
| Q9PHN0      | Cj0637c                                                            | C8J_0596                              | WP_002866497.1                                     | NA      | only in WT                                         | 2                 | Peptide methionine sulfoxide reductase MsrA                                 |                       |
| Q0PB73      | Cj0437                                                             | C8J_0412                              | WP_002867001.1                                     | 0.00010 | 0.30                                               | 54                | Succinate dehydrogenase, flavoprotein subunit                               | Tat/SPI               |
| Q0PBP1      | Cj0264c                                                            | C8J_0241                              | WP_002871921.1                                     | 0.00010 | 0.37                                               | 62                | Trimethylamine-N-oxide reductase                                            | Tat/SPI               |
| Q0PB72      | Cj0438                                                             | C8J_0413                              | WP_002854950.1                                     | 0.00010 | 0.23                                               | 45                | Succinate dehydrogenase, iron-sulfur protein subunit                        |                       |
| Q0P885      | Cj1540                                                             | C8J_1439                              | WP_002877290.1                                     | 0.00010 | 0.27                                               | 29                | Tungstate-binding protein TupA                                              | Sec/SPI               |
| Q0PAS1      | Cj0596                                                             | C8J_0558                              | WP_002876664.1                                     | 0.00010 | 0.38                                               | 32                | Putative peptidyl-prolyl cis-trans isomerase Cbf2                           | Sec/SPI               |
| Q9PPD9      | Cj0780                                                             | C8J_0731                              | WP_002866908.1                                     | 0.00010 | 0.52                                               | 91                | Periplasmic nitrate reductase                                               | Tat/SPI               |
| Q0PC89      | Cj0037c                                                            | C8J_0040                              | WP_002859743.1                                     | 0.00010 | 0.34                                               | 16                | Putative cytochrome C                                                       | Sec/SPI               |
| Q0PC96      | Cj0029                                                             | C8J_0028                              | WP_072238642.1                                     | 0.00017 | 0.35                                               | 27                | Cytoplasmic L-asparaginase                                                  | Sec/SPII              |
| Q0P8E1      | Cj1476c                                                            | C8J_1381                              | WP_002877436.1                                     | 0.00023 | 0.69                                               | 81                | Pyruvate-flavodoxin oxidoreductase                                          |                       |
| Q0PC50      | Cj0087                                                             | C8J_0079                              | WP_002854440.1                                     | 0.00083 | 0.51                                               | 67                | Aspartate ammonia-lyase                                                     |                       |
| O69294      | Cj1364c                                                            | C8J_1282                              | WP_002877339.1                                     | 0.00296 | 0.51                                               | 55                | Fumarate hydratase class II                                                 |                       |
| Q0P9N4      | Cj1018c                                                            | C8J_0955                              | WP_002853905.1                                     | 0.00715 | 0.25                                               | 18                | Branched-chain amino-acid ABC transport system, periplasmic binding protein | Sec/SPI               |
| Q0PBF1      | Cj0358                                                             | C8J_0335                              | WP_012006644.1                                     | 0.01006 | 0.45                                               | 26                | Cytochrome c551 peroxidase                                                  | Sec/SPI               |
| Q0P9A3      | Cj1153                                                             | C8J_1099                              | WP_002852762.1                                     | 0.02261 | 0.48                                               | 15                | Cytochrome c553                                                             | Sec/SPI               |
| A0A0H3PHN8  | CJJ81176_0836                                                      | C8J_0766                              | WP_002866967.1                                     | 0.06950 | 0.45                                               | 17                | Amino acid-binding protein                                                  | Sec/SPI               |
| Q0PBP0      | Cj0265c                                                            | C8J_0242                              | WP_009881977.1                                     | 0.11800 | 0.36                                               | 7                 | Putative cytochrome C-type haem-binding periplasmic protein                 | Sec/SPI               |
| A0A0H3P9I6  | CJJ81176_0884                                                      | C8J_0815                              | WP_002865930.1                                     | 0.12942 | 0.32                                               | 8                 | Cytochrome c family protein, degenerate                                     | Sec/SPI               |
| Q0PBB6      | Cj0394c                                                            | C8J_0369                              | WP_002854234.1                                     | 0.13552 | 0.52                                               | 4                 | Type III pantothenate kinase                                                |                       |
| Q0P987      | Cj1169c                                                            | C8J_1113                              | WP_002822505.1                                     | 0.14064 | 0.07                                               | 6                 | Putative periplasmic protein                                                | Sec/SPII              |
| Q0P8G9      | Cj1445c                                                            | C8J_1352                              | WP_002851300.1                                     | 0.16531 | 0.34                                               | 5                 | Capsule polysaccharide export system inner membrane protein                 |                       |
| Q9PIE2      | Cj0360                                                             | C8J_0336                              | WP_002866639.1                                     | 0.22813 | 0.53                                               | 9                 | Phosphoglucosamine mutase                                                   |                       |
| P0C633      | Cj1029c                                                            | C8J_0966                              | WP_002852941.1                                     | 0.27848 | 0.38                                               | 5                 | Outer membrane lipoprotein MapA                                             | Sec/SPII              |
| A0A0H3P9J4  | CJJ81176_0882                                                      | C8J_0813                              | WP_002865932.1                                     | 0.27983 | 0.48                                               | 13                | Arylsulfate sulfotransferase, degenerate                                    | Sec/SPI               |
| Q0P8K8      | Cj1406c                                                            | C8J_1320                              | WP_002932559.1                                     | 0.28483 | 0.29                                               | 5                 | Putative periplasmic protein                                                | Sec/SPI               |

|                   |               |          |                |         |      |    |                                                                                           |          |
|-------------------|---------------|----------|----------------|---------|------|----|-------------------------------------------------------------------------------------------|----------|
| <b>Q0P819</b>     | Cj1609        | C8J_1510 | WP_002866588.1 | 0.36017 | 0.37 | 7  | Putative sulfate adenylyltransferase                                                      |          |
| <b>Q0P9Z0</b>     | Cj0909        | C8J_0845 | WP_002856967.1 | 0.36997 | 0.30 | 11 | Putative periplasmic protein                                                              | Sec/SPI  |
| <b>Q0PBK6</b>     | Cj0303c       | C8J_0280 | WP_002857589.1 | 0.37929 | 0.35 | 10 | Putative molybdate-binding lipoprotein                                                    | Sec/SPII |
| <b>A0A0H3PDT4</b> | CJJ81176_1617 | C8J_1528 | WP_002856602.1 | 0.38723 | 0.15 | 4  | PepSY_like domain-containing protein                                                      | Sec/SPI  |
| <b>A0A0H3PA35</b> | CJJ81176_0880 | C8J_0811 | WP_002865934.1 | 0.39565 | 0.44 | 8  | Thiol:disulfide interchange protein DsbA                                                  | Sec/SPI  |
| <b>A0A0H3PA64</b> | CJJ81176_0067 | C8J_0033 | WP_012006617.1 | 0.40641 | 0.55 | 36 | Gamma-glutamyltransferase                                                                 | Sec/SPI  |
| <b>Q0P966</b>     | Cj1190c       | C8J_1134 | WP_002877106.1 | 0.51006 | 0.09 | 3  | Bipartate energy taxis response protein cetA                                              |          |
| <b>Q0PA57</b>     | Cj0833c       | C8J_0780 | WP_002866956.1 | 0.51304 | 0.44 | 5  | Putative oxidoreductase                                                                   |          |
| <b>Q0P9N3</b>     | Cj1019c       | C8J_0956 | WP_002866056.1 | 0.51583 | 0.43 | 18 | Branched-chain amino-acid ABC transport system periplasmic binding protein                | Sec/SPI  |
| <b>Q0P8L8</b>     | Cj1394        | C8J_1309 | WP_002877369.1 | 0.52206 | 0.48 | 16 | Adenylosuccinate lyase                                                                    |          |
| <b>Q0PAQ4</b>     | Cj0613        | C8J_0575 | WP_002825033.1 | 0.53194 | 0.27 | 11 | Putative periplasmic phosphate binding protein                                            |          |
| <b>Q9PID1</b>     | Cj0371        | C8J_0347 | WP_002854351.1 | 0.54071 | 0.36 | 7  | UPF0323 lipoprotein Cj0371                                                                | Sec/SPII |
| <b>A0A0H3PA46</b> | CJJ81176_1678 | C8J_1583 | WP_002877023.1 | 0.55804 | 0.18 | 7  | DNA topoisomerase 1                                                                       |          |
| <b>Q0P8U3</b>     | Cj1314c       | C8J_1248 | WP_002866282.1 | 0.55922 | 0.49 | 5  | Putative imidazole glycerol phosphate synthase subunit hisF2                              |          |
| <b>Q0PC19</b>     | Cj0118        | C8J_0111 | WP_002866734.1 | 0.55959 | 0.23 | 7  | ATP_bind_3 domain-containing protein                                                      |          |
| <b>Q0PBD3</b>     | Cj0377        | C8J_0353 | WP_002857315.1 | 0.57612 | 0.52 | 2  | Putative AAA family ATPase                                                                |          |
| <b>Q0P9Z2</b>     | Cj0906c       | C8J_0843 | WP_002865910.1 | 0.57689 | 0.53 | 3  | Putative periplasmic protein                                                              | Sec/SPI  |
| <b>A1W0G5</b>     | CJJ81176_1196 | C8J_1125 | WP_002866193.1 | 0.62675 | 0.54 | 3  | Elongation factor Ts                                                                      |          |
| <b>Q0PAI0</b>     | Cj0699c       | C8J_0666 | WP_002854995.1 | 0.62995 | 0.55 | 17 | Glutamine synthetase                                                                      |          |
| <b>Q9PJ53</b>     | Cj0666c       | C8J_0059 | WP_002852001.1 | 0.63571 | 0.49 | 7  | 3-dehydroquinase dehydratase                                                              |          |
| <b>Q0P8A3</b>     | Cj1516        | C8J_1419 | WP_002867060.1 | 0.63661 | 0.38 | 3  | Putative periplasmic oxidoreductase                                                       | Tat/SPI  |
| <b>Q9PNC3</b>     | Cj1172c       | C8J_1116 | WP_002866185.1 | 0.64862 | 0.45 | 6  | Probable transcriptional regulatory protein Cj1172c                                       |          |
| <b>Q0PBX4</b>     | Cj0163c       | C8J_0160 | WP_002854663.1 | 0.64862 | 0.45 | 3  | Uncharacterized protein                                                                   |          |
| <b>Q9PHM1</b>     | Cj0646        | C8J_0605 | WP_002852227.1 | 0.65354 | 0.51 | 3  | Endolytic peptidoglycan transglycosylase RlpA                                             | Sec/SPII |
| <b>Q0PBA0</b>     | Cj0410        | C8J_0385 | WP_002854302.1 | 0.65423 | 0.50 | 6  | Fumarate reductase iron-sulfur subunit                                                    |          |
| <b>Q0P9X8</b>     | Cj0921c       | C8J_0858 | WP_002865903.1 | 0.66635 | 0.33 | 48 | Major cell-binding factor                                                                 | Sec/SPI  |
| <b>Q9PIS2</b>     | Cj0207        | C8J_0196 | WP_002851726.1 | 0.66635 | 0.39 | 5  | Translation initiation factor IF-3                                                        |          |
| <b>Q0PA47</b>     | Cj0843c       | C8J_0790 | WP_002861483.1 | 0.67304 | 0.55 | 8  | Putative secreted transglycosylase                                                        | Sec/SPI  |
| <b>Q0PBJ3</b>     | Cj0316        | C8J_0293 | WP_002866665.1 | 0.68210 | 0.21 | 3  | Bifunctional chorismate mutase/prephenate dehydratase                                     |          |
| <b>Q0PB54</b>     | Cj0459c       | C8J_0432 | WP_002851103.1 | 0.69391 | 0.54 | 5  | HP0268 domain-containing protein                                                          |          |
| <b>Q0P7V9</b>     | Cj1670c       | C8J_1571 | WP_002866836.1 | 0.69774 | 0.38 | 5  | Putative periplasmic protein                                                              | Sec/SPI  |
| <b>A0A0H3PAA5</b> | CJJ81176_0419 | C8J_0371 | WP_002865885.1 | 0.71779 | 0.49 | 3  | Lipoprotein, putative                                                                     | Sec/SPII |
| <b>A0A0H3PAM0</b> | CJJ81176_0310 | C8J_0260 | WP_002857311.1 | 0.72592 | 0.55 | 4  | Histidine kinase                                                                          |          |
| <b>Q0PA24</b>     | Cj0872        | C8J_0814 | WP_002865931.1 | 0.74268 | 0.34 | 5  | Thiol:disulfide interchange protein DsbA                                                  | Sec/SPI  |
| <b>Q0P7X0</b>     | Cj1659        | C8J_1561 | WP_002778842.1 | 0.74296 | 0.49 | 12 | Periplasmic protein p19                                                                   | Sec/SPI  |
| <b>Q0P8J8</b>     | Cj1416c       | C8J_0637 | WP_002877674.1 | 0.76348 | 0.40 | 5  | Putative sugar-1-phosphate nucleotidyltransferase CTP:phosphoglutamine cytidyltransferase |          |

|                   |               |          |                |         |      |    |                                                              |          |
|-------------------|---------------|----------|----------------|---------|------|----|--------------------------------------------------------------|----------|
| <b>Q0PC72</b>     | Cj0061c       | C8J_0054 | WP_002851943.1 | 0.76548 | 0.48 | 5  | RNA polymerase sigma factor for flagellar operon             |          |
| <b>Q0PAR2</b>     | Cj0605        | C8J_0567 | WP_002866476.1 | 0.78667 | 0.43 | 5  | Putative amidohydrolase                                      |          |
| <b>Q0P9E8</b>     | Cj1106        | C8J_1047 | WP_002856169.1 | 0.82742 | 0.53 | 2  | Putative periplasmic thioredoxin                             | Sec/SPII |
| <b>Q9PI18</b>     | Cj0491        | C8J_0453 | WP_002866973.1 | 0.85245 | 0.51 | 3  | 30S ribosomal protein S12                                    |          |
| <b>Q9PNH7</b>     | Cj1117c       | C8J_1058 | WP_002866133.1 | 0.88173 | 0.53 | 2  | Ribosomal protein L11 methyltransferase                      |          |
| <b>Q0P8F0</b>     | Cj1465        | C8J_1371 | WP_002826016.1 | 0.88637 | 0.37 | 4  | Uncharacterized protein                                      |          |
| <b>Q0PBD4</b>     | Cj0376        | C8J_0352 | WP_002868686.1 | 0.90631 | 0.47 | 3  | Putative periplasmic protein                                 | Sec/SPI  |
| <b>Q9PMK5</b>     | Cj1455        | C8J_1361 | WP_002867022.1 | 0.93469 | 0.45 | 8  | Peptide chain release factor 2                               |          |
| <b>A0A0H3PHM5</b> | CJJ81176_0858 | C8J_0788 | WP_002856787.1 | 0.94089 | 0.43 | 5  | Molybdopterin-guanine dinucleotide biosynthesis protein MobB |          |
| <b>Q0P9G5</b>     | Cj1089c       | C8J_1030 | WP_002858150.1 | 0.95413 | 0.43 | 3  | Uncharacterized protein                                      |          |
| <b>Q9PLX0</b>     | Cj1708c       | C8J_1612 | WP_002779353.1 | 0.96946 | 0.47 | 5  | 30S ribosomal protein S10                                    |          |
| <b>Q0PAX0</b>     | Cj0546        | C8J_0507 | WP_002866428.1 | 0.97938 | 0.50 | 5  | 3-octaprenyl-4-hydroxybenzoate carboxy-lyase, putative       |          |
| <b>Q0P8N7</b>     | Cj1372        | C8J_1291 | WP_002866711.1 | 0.98089 | 0.52 | 5  | Toluene tolerance protein, putative                          | Sec/SPI  |
| <b>Q0PBS4</b>     | Cj0230c       | C8J_0208 | WP_012006633.1 | 0.98623 | 0.44 | 10 | Nicotinate phosphoribosyltransferase                         |          |
| <b>Q0P9V7</b>     | Cj0942c       | C8J_0885 | WP_002866879.1 | 1.00000 | 0.45 | 2  | Protein translocase subunit SecA                             |          |
| <b>Q0PCC0</b>     | Cj0005c       | C8J_0005 | WP_002866803.1 | 1.00000 | 0.45 | 10 | Molybdopterin containing oxidoreductase                      | Tat/SPI  |
| <b>Q0P8R5</b>     | Cj1344c       | C8J_1260 | WP_002892992.1 | 1.00000 | 0.32 | 3  | tRNA N6-adenosine threonylcarbamoyltransferase               |          |
| <b>A0A0H3P9J5</b> | CJJ81176_0921 | C8J_0850 | WP_002865905.1 | 1.00000 | 0.31 | 3  | Invasion antigen B                                           |          |
