# Supplementary material for: Interplay between DsbA1, DsbA2 and C8J_1298 Periplasmic Oxidoreductases of Campylobacter jejuni and Their Impact on Bacterial Physiology and Pathogenesis
Source: MDPI journal article supplement (doi:10.3390/ijms222413451), 2021-12-15
Supplement: s1 [file s1]

(A)

LivJ\_C.jejuni 1 MKKLTLTSLVLTM---VNCLYAKDINIGVVLPLTGTVAAYGQDVFNGIELANKLQPKLS--NGDVIKLI 64  
LivK\_C.jejuni 1 MKKSLILASILSL-----SLSAAEVKIGVVLPLSGATAAYGQSALEGIKLANSMQSALS--NGDKVSLA 62  
LivJ\_E.coli 1 MNIKGKALLAGCIALAFSNMALAEDIKVAVVGAMSGPVAQYGDQEF TGAEQAVADINAKGGIKGNKLQIV 70  
LivK\_E.coli 1 MKRNAKTI IAGMIALA ISHTAMADDIKVAVVGAMSGPIAQWGDMEFNGARQA IKDINA KGGIKGDKLVGV 70  
Consensus\_ss: hhhhhhhhhhhhhhh eeeeeee hhhhhhhhhhhhhhhhhhh eeeeeee

LivJ\_C.jejuni 65 TIDTKGDKLETSNGVNRLIATDKVLGIIGEATTPNTIQAISIAEEKKIPLIAPVASGDKLLDK-KKYASR 133  
LivK\_C.jejuni 63 IIDTKGDKLESSSGANRLVSQDKVIGLIGEMVTANTLQVMRVAEDNKIPLIAPAATGDRLLDK-KIYSSR 131  
LivJ\_E.coli 71 KYDDACDPKQAVAVANKVVND-GIKYVIGHLCSSSTQPASDIYEDEGILMITPAATAPELTARGYQLILR 139  
LivK\_E.coli 71 EYDDACDPKQAVAVANKIVND-GIKYVIGHLCSSSTQPASDIYEDEGILMISPGATNPELTQRGYQHIMR 139  
Consensus\_ss: eee hhhhhhhhhhhhh eeee hhhhhhhhhhhhh eeeee hhh eeee

LivJ\_C.jejuni 134 VCFKDSFQGDKFATYVSKDLGLKNAVIIIDQSNVYSLGLARAFENSFKNNGGKI IKKLVINSGDKDFRAV 203  
LivK\_C.jejuni 132 VCFMDSFQGS SLAKYVFSKLNYSKSAVIVVDQSTDYSLGLAKAFEKQYKSNGGQILRLIRLVNSGDKDFRAI 201  
LivJ\_E.coli 140 TTGLDS DQGP TAAKYILEKV K PQ-RIAI VHDKQYGEGLARAVQDGLKKGNAVNVFFDGITAGEKDFSTL 208  
LivK\_E.coli 140 TAGLDSSQGPTAAKYILETVK PQ-RIAI IHDKQYGEGLARSVDGLKAANANVVFFDGITAGEKDF SAL 208  
Consensus\_ss: e hhhhhhhhhhhhh eeeeeee hhhhhhhhhhhhh eeeeeee hhhh

LivJ\_C.jejuni 204 VSQ LKS LNP DFVYMPIYHPEAALIARQARQIGFDKLLVAGDGVNNQTFIDLGSSAVNGVIFTDSFDYNSP 273  
LivK\_C.jejuni 202 VAQVKSLNPEFIFLPLYSEASLFARQSKLAGLNIPMG SADGVADQTFISLAGDASEGYIFTDSFDANNP 271  
LivJ\_E.coli 209 VARLKKENIDFVYGGYHPMGQILRQARAAGLKTQFMGPEGVANVSLSN IAGESAEGLLVTKPKNY--D 276  
LivK\_E.coli 209 IARLKKENIDFVYGGYYPMGQMLRQARSVGLKTQFMGP EGVGNASLSNIAGDAAEGLVTPMPKRY--D 276  
Consensus\_ss: hhhhhh eeeee hhhhhhhhhhh eeeee hhhhhhhhh eeeee

LivJ\_C.jejuni 274 STQLGKDFVAAYEKVKGTKELPASFAMGADAYFVMLNAMNACVDNLSSECINSKIHQTKDFQAVG GVISI 343  
LivK\_C.jejuni 272 TTKLSKEFISVYEKAKGTKEVPNFSAMGADAYFVMLNAMNACVENLTSKCVNEKIHQTKNYQGVSGVISI 341  
LivJ\_E.coli 277 QVPANKPIVDAIKAKKQD-PSGAFVWTTYAALQSLQAGLNQS---DDPAEIAKY LKAN-SVDVTMGPLTW 341  
LivK\_E.coli 277 QDPANQGI VDALKADKKD-PSG PYVWIT YAAVQSLATA LERTGS-DEPLALVKDLKAN-GANTVI GPLNW 343  
Consensus\_ss: hhhhhhhhhhhhh hhhhhhhhhhhhhhhhhhh hhhhhhhh eeeee

LivJ\_C.jejuni 344 DESGNAIR-SVVIKEIQNKQNYKTIINP 371  
LivK\_C.jejuni 342 DQTGNATR-SVVVKEIKNQKQNYKDIINP 369  
LivJ\_E.coli 342 DEKGD LKGFEFGVFDWHANGTATDAK--- 367  
LivK\_E.coli 344 DEKGD LKGFD FGVFQWHADGSSTA AK--- 369  
Consensus\_ss: eeeeeee eeeeeee

(B)

|        | EcLivJ        | EcLivK        | CjLivJ        | CjLivK       |
|--------|---------------|---------------|---------------|--------------|
| EcLivJ | -             | (100% QC) 77% | (92% QC) 28%  | (70% QC) 30% |
| EcLivK | (100% QC) 77% | -             | (75% QC) 29%  | (66% QC) 28% |
| CjLivJ | (93% QC) 28%  | (74% QC) 29%  | -             | (94% QC) 64% |
| CjLivK | (73% QC) 29%  | (69% QC) 28%  | (100% QC) 62% | -            |
